# Supplementary material
Source: HighWire-hosted journal article supplement (https://jnm.snmjournals.org/highwire/filestream/94553/field_highwire_adjunct_files/0/125187_Supplemental_Data.pdf)
Supplement: 125187_Supplemental_Data.pdf [file 125187_Supplemental_Data.pdf]

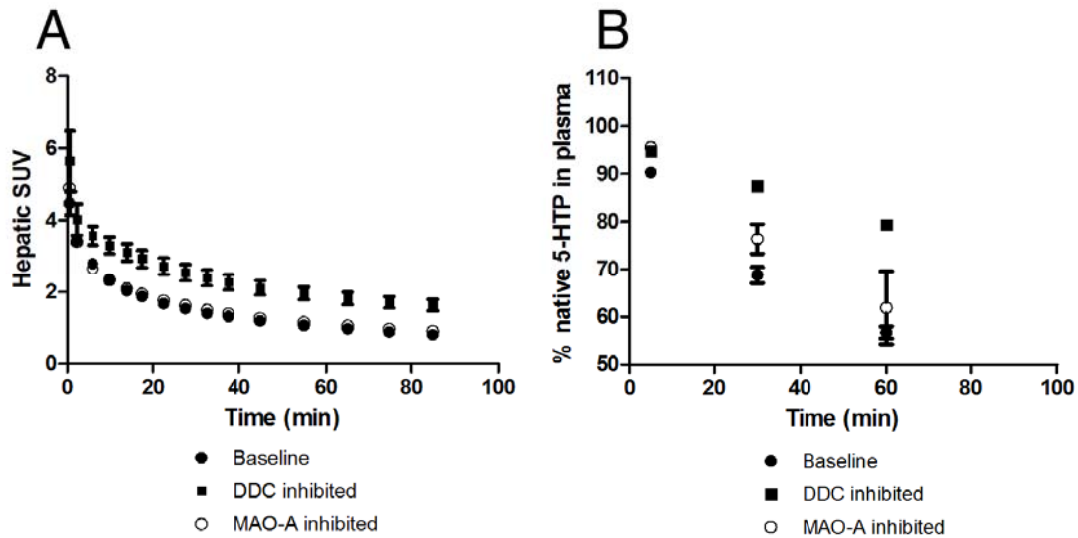

**Supplemental figure 1.** The PET measurements of [ $^{11}\text{C}$ ]5-HTP uptake in liver (A) or percentage of native [ $^{11}\text{C}$ ]5-HTP in blood plasma (B) of non-human primate are plotted over time. Pretreatment with carbidopa (A, filled squares) increased hepatic uptake when compared with tracer alone (A, filled circles) by increasing the amount of native [ $^{11}\text{C}$ ]5-HTP in plasma (B, filled squares). Pretreatment with clorgyline did not affect hepatic retention (A, open circles) indicating low MAO-A activity in the liver. Correspondingly, inhibition of MAO-A has marginal effects on the levels of native [ $^{11}\text{C}$ ]5-HTP in plasma (B, open circles).

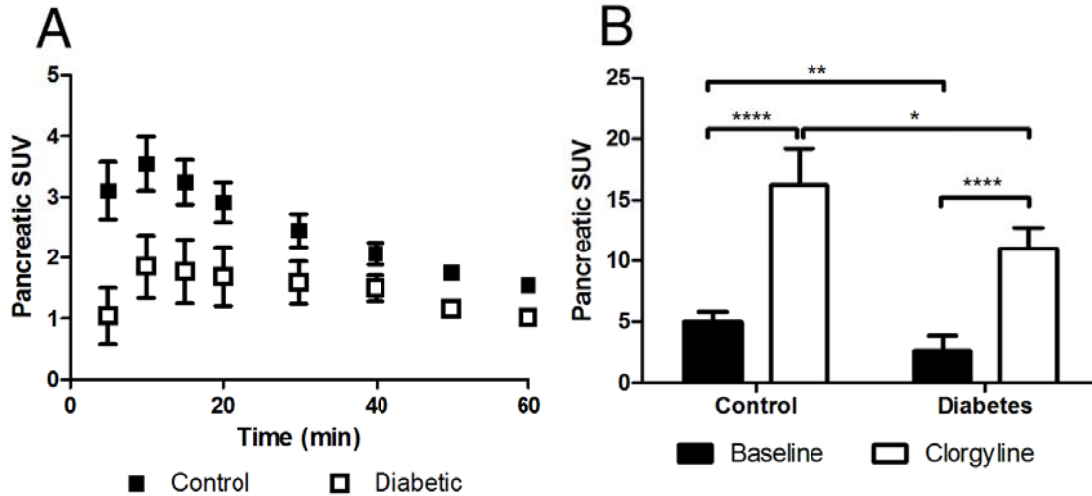

**Supplemental figure 2.** Uptake of [<sup>11</sup>C]5-HTP in Sprague Dawley rats measured by  $\mu$ PET/CT (A). The animals were either hyperglycemic through STZ induced diabetes (n=3) or healthy, normoglycemic controls (n=4). Time-dependent uptake of tracer in pancreas is decreased in animals with induced diabetes. Pretreatment by MAO-A inhibitor clorgyline significantly increased the accumulation of [<sup>11</sup>C]5-HTP 30 minutes after tracer administration in both healthy and diabetic rats (B).
